# Supplementary material
Source: Elsevier journal article supplement (https://www.sciencedirect.com/science/article/pii/S1579212918301538)
Supplement: mmc1 [file S1579212918301538:mmc1.docx]

**PROYECTO: MECANISMO DE GÉNESIS Y EVOLUCIÓN DEL ASMA (MEGA)**

**FECHA DE CRIBADO: ……. / ………. / ……………**

**HOSPITAL DE ORIGEN: ………………………………………………………………………………**

**CÓDIGO: ………………………………….**

**CONSENTIMIENTO INFORMADO:**
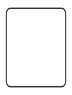
Sí
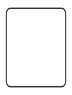
 No

**I. DATOS DEMOGRÁFICOS:**

**1. Edad: …………..** años

**2. Sexo:**
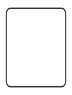
Hombre
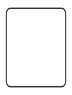
 Mujer

**3. Raza:**


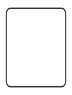
 Caucásico
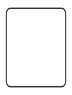
 Asiático
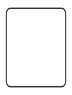
 Negra
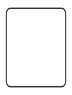
 Hispano
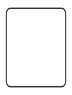
 Otros:……………………….

**II. ANTECEDENTES INFANTILES:**

**1. HISTORIA NEONATAL** (<3 años):


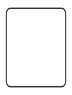
 Sí
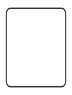
 No


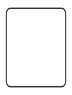
 Prematuridad


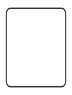
 Distrés respiratorio


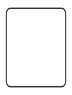
 Bronquiolitis


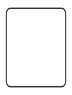
 Otras enfermedades respiratorias: ________________

_______________________________________________

**2. ANTECEDENTES INFANTILES** (3 - 14 años):


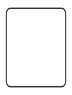
 Sí
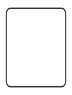
 No


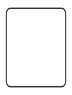
 Bronquiolitis


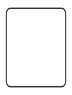
 Infecciones respiratorias recurrentes


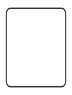
 Rinitis


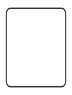
 Otitis


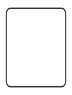
 Sinusitis


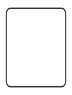
 Otras enfermedades respiratorias

**3. NACIMIENTO** (tipo de alumbramiento):
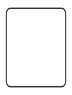
 Eutócico
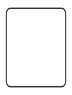
 Distócico

**4. LUGAR DE RESIDENCIA EN LA INFANCIA**:
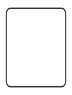
 Urbana
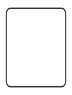
 Rural

**5. CLASE SOCIAL EN LA INFANCIA**:


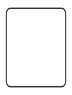
 Alta
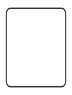
 Media
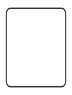
 Baja

**6. COEXISTENCIA ESTRECHA CON ANIMALES DOMESTICOS:**
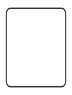
 Sí
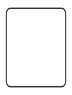
 No

**III. DIAGNOSTICO DE ASMA:**

**1. TIPO DE MÉDICO ESPECIALISTA:**


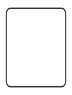
 Alergólogo
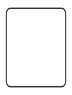
 Neumólogo
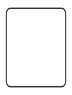
 Médico de Familia
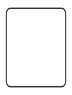
 Otros……………………..

**2. DIAGNÓSTICO**:

- Síntomas :
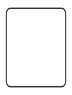
 Sí
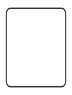
 No
- Espirometría :
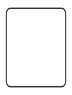
 Sí
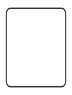
 No
- Test Broncodilatador :
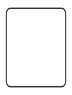
 Sí
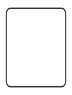
 No
- Test de PBI :
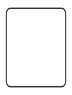
 Sí
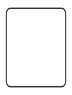
 No
- Variabilidad del Peak Flow:
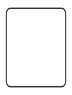
 Sí
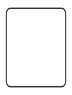
 No
- Óxido Nítrico :
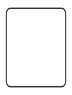
 Sí
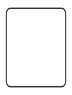
 No
- Eosinofilia en Esputo :
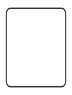
 Sí
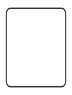
 No
- Test terapéutico con CE:
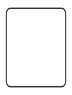
 Sí
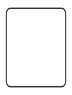
 No

**IV. HISTORIA PERSONAL:**

**1. Lugar de residencia actual:**
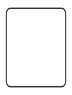
 Urbano
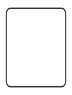
 Rural

**2. Nivel de estudios completados:**


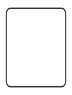
 No estudios
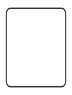
 Primario
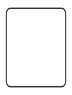
 Secundario
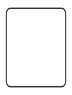
 Superior

**3. Clase social actual:**


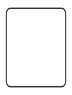
 Clase I (Profesionales y empresarios con >10 trabajadores)


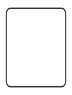
 Clase II (Ocupaciones intermedias y empresarios con <10 trabajadores)


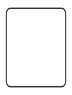
 Clase III (Trabajadores no manuales calificados)


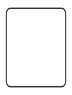
 Clase IVa (Trabajadores manuales semi-calificados)


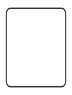
 Clase IVb (Trabajadores manuales calificados)


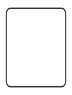
 Clase V (Trabajadores manuales no calificados)

**4. Convivencia con animales domésticos:**
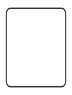
Sí
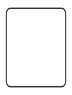
 No

**V. USO DE SUSTANCIAS:**

**1. Hábito tabáquico:**


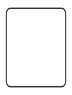
 Fumador

*Año de Inicio: …………

*Nº paquetes-años: ……


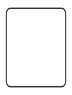
 No fumador


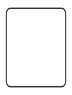
 Ex-Fumador

*Año de inicio: …………...

*Año de finalización:…….


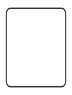
 Fumador pasivo

* Nº paquetes-años:……..

**2. Hábito enólico:**
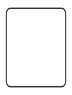
 Sí UBE: ………………………………………………..


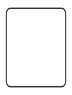
 No

**3. Actividad física:**
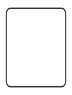
 Sí Horas/semana: …………………..


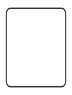
 No

**VI. OCUPACIÓN:**

**1. Ocupación actual:** ____________________________________

Año de Inicio: …………..

¿Continúa trabajando?:
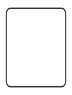
 Sí


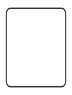
 No (año de finalización: ______)

**2. Otras ocupaciones:** ____________________________________

Año de Inicio: …………………..

Año de finalización: ……………

**3. Pasatiempos de riesgo:**
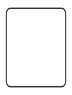
 Sí Cual?: ________________________________


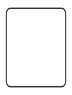
 No

**VII. ALERGIAS:**

**1. Prick o Rast:**
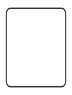
Negativo


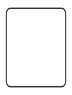
 Positivo:


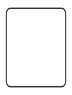
 Ácaro:


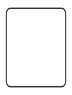
 Epitelio:


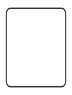
 Polen:


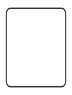
 Hongos:


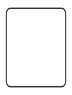
 Agentes ocupacionales: _____________


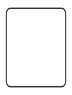
 Alimentos: ________________________


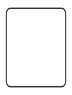
 Otros: ____________________________________

Descripción ……………………………………………………………….

**2. Atopia: Prick test y/o IgE específica positiva a alérgeno común**
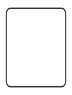
Sí
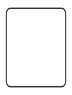
 No

**3. Rinitis alérgica**
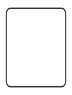
Sí
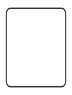
 No

**4. Dermatitis atópica**
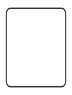
Sí
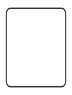
 No

**5. Conjuntivitis alérgica**
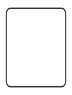
Sí
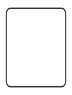
 No

**6. Otitis**
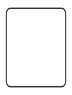
Sí
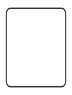
 No

**7. Rinosinusitis crónica con poliposis**
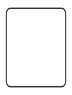
Sí
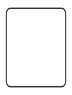
 No

**8. Pólipos nasales**
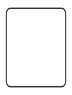
Sí No

**9. Intolerancia a los AINEs** Sí No

**10. Anosmia** Sí No

**11. Aspergillus**  Sí No

**12. Alergia medicamentosa:** Sí No

**13. Animales: perros** Sí No

**14. Animales: gato** Sí No

**15. Animales: Otros** Sí No

**16. Alergia alimentaria: Leche** Sí No

**17. Alergia alimentaria: Huevo** Sí No

**18. Alergia alimentaria: Pescado**  Sí No

**19. Alergia alimentaria: Mariscos** Sí No

**20. Alergia alimentaria: Cereales** Sí No

**21. Alergia alimentaria: Nueces** Sí No

**22. Alergia alimentaria: Habichuelas** Sí No

**23. Alergia alimentaria: Frutas** Sí No

**24. Alergia alimentaria: Otros** Sí No

**25. Alternaria** Sí No

**VIII. OTRAS ENTIDADES ASOCIADAS CON ASMA:**

**1. Otras entidades asociadas con asma:** Sí Entidad __________________

No

**2. Otras entidades asociadas con asma o que puede influenciar o simular asma durante la enfermedad:**

Sí Entidad __________________

No

**IX. COMORBILIDADES:**

**Comorbilidades:** No

Sí *Entidad: _____________________

*Entidad: _____________________

*Entidad: _____________________

**X. HISTORIA DE ASMA:**

**1. Familiares de primer grado con historia de asma?:**  Sí No

**2. Familiares de primer grado con historia de atopia?:** Sí No

**3. Año de debut del asma:** _________

**4. Severidad en el debut (GEMA/GINA):**

Intermitente Leve Moderado Severo

**5. Severidad actual (paso terapéutico):**

Intermitente Leve Moderado Severo

**6. Control actual:**

Controlado Parcialmente controlado No controlado:

**7. Relación de los síntomas con la menstruación:** Sí No

**8. Relación de los síntomas con el embarazo:** Sí No

**9. Asma Ocupacional:**  Sí No

**10 Asma agravado por el trabajo:** Sí No

**11. Exacerbaciones severas** (Promedio anual en los últimos 3 años): _______

**12. Visitas por el departamento de urgencias** (Promedio anual en los últimos 3 años): ____

**13. Nº visitas totales al departamento de urgencias en el último año:** _________

**14. Número total de ingresos hospitalarios previos** (no UCI) :_______

**15. Número total de ingresos en UCI**:__________

**XI. TRATAMIENTO DEL ASMA:**

**1. Corticoide Inhalado (CI)** Sí No

¿Cuál?: ___________________

Dosis/día: ___________________

Dispositivo: ___________________

**2. Corticoide Sistémico (CS)**  Sí No

¿Cuál?: ___________________

Dosis/día: ___________________

Dispositivo: ___________________

**3. Beta agonistas de larga duración (LABA):** Sí No

¿Cuál?: ___________________

Dosis/día: ___________________

Dispositivo: ___________________

**4. Beta agonistas de corta duración (SABA):** Sí No

¿Cuál?: ___________________

Dosis/día: ___________________

Dispositivo: ___________________

**5. Anticolinérgico de larga duración (LAMA):** Sí No

¿Cuál?: ___________________

Dosis/día: ___________________

Dispositivo: ___________________

**6. Anticolinérgico de corta duración (SAMA):** Sí No

¿Cuál?: ___________________

Dosis/día: ___________________

Dispositivo: ___________________

**7. Montelukast:**  Sí No

¿Cuál?: ___________________

Dosis/día: ___________________

**8. Teofilinas:** Sí No

¿Cuál?: ___________________

Dosis/día: ___________________

**9. Inhibidor de la fosfodiesterasa-4**  Sí No

¿Cuál?: ___________________

Dosis/día: ___________________

**10. Omalizumab:**  Sí No Dosis/mes: ___________________

**11. Macrólidos:**  Sí No

¿Cuál?: ___________________

Dosis/día: ___________________

**12. Otros:** Sí No

¿Cuál?: ___________________

Dosis/día: ___________________

**13. Combinados de CI + LABA**  Sí No

¿Cuál?: ___________________

Dosis/día: ___________________

**14. Tratamiento de exacerbaciones:** ______ (Nº ciclos, de CS ≥3 días seguidos/año)

**15. Correcto manejo de los inhaladores:** Sí No

**16. Adherencia al tratamiento:** Adecuada Regular Mala

**XII. MEDICACIÓN CONCOMITANTE:**

¿Medicación concomitante? Sí No

¿Cuál?: ___________________

Dosis/día: ___________________

¿Medicación específica de enfermedad? Sí No

Enfermedad: _______________

Medicamento: ________________

Enfermedad: _______________

Medicamento: ________________

**XIII. SINTOMAS:**

Calificar del 1 al 5 (*0: no síntomas; 1: muy leve, 2: leve; 3: moderado; 4: severo; 5: muy severo*).

-Tos : ______

-Disnea : ______

-Sibilantes : ______

-Expectoración : ______

-Opresión torácica : ______

**XIV. EXAMEN FÍSICO:**

1. Peso (Kg): _________

2. Talla (cm): _________

3. PA: ________ / ________

4. Hallazgos: No

Sí: _______________________________

**XV. ESPIROMETRÍA:**

1. Espirometria realizada: Sí

No

2. Parámetros: FVC: ______ ( )

FEV1: ______ ( )

FEV1%: ______ ( )

TLC: ______ ( )

VR: ______ ( )

DLCO ______ ( )

TLCO/VA. ______ ( )

3. Prueba Broncodilatadora:

Sí No

Positiva

Negativa

4. Prueba de provocación con metacolina: Sí Positiva (PC20:______ ; DRR:_______)

Negativa.

No

**XVI. AIRE EXHALADO:**

1. Aire Exhalado realizado: Sí No

2. Parámetros:

a. FENO: Sí (valor: ____) No

b. CO espirado: Sí (valor: ___ ) No

c. pH del aire condensado: Sí (valor: ___ ) No

**XVII. MATERIAL BIOLÓGICO:**

Material biológico extraído y almacenado: Sí No

a. Sangre: Sí No

b. Orina: Sí No

c. Aire condensado Sí No

**XVIII. ESPUTO INDUCIDO:**

Esputo inducido realizado: Sí No

**XIX. ANÁLISIS SANGUÍNEA:**

1. Total IgE (KU/L) : _________

2. Eosinofilos en sangre perifèrica : _________

3. Anomalías en las pruebas de laboratoria a revisar : No

Sí 🡪 Especifica: ____________________________

**XX. CUESTIONARIO DE ADHERENCIA AL TRATAMIENTO (Test Morisky – Green):**

Sí No

**XXI. CUESTIONARIO ACT:**

Sí No

**XXII. CUESTIONARIO mini AQLQ:**

Sí No

**XXIII. CUESTIONARIO HAD:**

Sí No

**XXIV. CUESTIONARIO DE SÍNTOMAS NASOSINUSALES:**

Sí No

**PROYECTO: MECANISMO DE GÉNESIS Y EVOLUCIÓN DEL ASMA (MEGA)**

**FECHA DE CRIBADO: ……. / ………. / ……………**

**HOSPITAL DE ORIGEN: ………………………………………………………………………………**

**CÓDIGO: ……………………………… NÚMERO DE VISITA: ……………….**

**CONTINUACIÓN VOLUNTARIA EN EL ESTUDIO:** Sí No

**I. ESTADO DE CONTROL:**

**1. Cambios con respecto a la visita previa:**  Sí No

**Cambio:**

Antecedentes médicos :

Uso de sustancias :

Ocupación :

Alergias :

Otras entidades :

Comorbilidades :

Historia de asma :

Tratamiento del asma :

Adherencia del tratamiento :

Medicación concomitante :

**II. SINTOMAS:**

Calificar del 1 al 5 (*0: no síntomas; 1: muy leve, 2: leve; 3: moderado; 4: severo; 5: muy severo*).

-Tos : ______

-Disnea : ______

-Sibilantes : ______

-Expectoración : ______

-Opresión torácica : ______

**III. EXAMEN FÍSICO:**

1. Peso (Kg): _________

2. Talla (cm): _________

3. BMI: ______________

3. PA: ________ / ________

4. Hallazgos: No

Sí: _______________________________

**IV. ESPIROMETRÍA:**

1. Espirometria realizada: Sí

No

2. Parámetros: FVC: ______ ( )

FEV1: ______ ( )

FEV1%: ______ ( )

TLC: ______ ( )

VR: ______ ( )

DLCO ______ ( )

TLCO/VA. ______ ( )

3. Prueba Broncodilatadora:

Sí No

Positiva

Negativa

4. Prueba de provocación con metacolina: Sí Positiva (PC20:______; DRR:_______)

Negativa.

No

**V. AIRE EXHALADO:**

1. Aire Exhalado realizado: Sí No

2. Parámetros:

a. FENO: Sí (valor: ____) No

b. CO espirado: Sí (valor: ___ ) No

c. pH del aire condensado: Sí (valor: ___ ) No

**VI. MATERIAL BIOLÓGICO:**

Material biológico extraído y almacenado: Sí No

a. Sangre: Sí No

b. Orina: Sí No

c. Aire condensado Sí No

**VII. ESPUTO INDUCIDO:**

Esputo inducido realizado: Sí No

Parámetros: ……………. (total de células) ……………(%)

**VIII. ANÁLISIS SANGUÍNEA:**

1. Total IgE (KU/L) : _________

2. Eosinofilos en sangre perifèrica : _________

3. Anomalías en las pruebas de laboratoria a revisar : No

Sí 🡪 Especifica: ____________________________

**IX. REALIZACIÓN DE TC DE TÓRAX:**

Sí No

**X. CUESTIONARIO DE ADHERENCIA AL TRATAMIENTO (Test Morisky – Green):**

Sí No

**XI. CUESTIONARIO ACT:**

Sí No

**XII. CUESTIONARIO mini AQLQ:**

Sí No

**XIII. CUESTIONARIO HAD:**

Sí No

**XIV. CUESTIONARIO DE SÍNTOMAS NASOSINUSALES:**

Sí No
